# Supplementary material for: SS18 regulates pluripotent-somatic transition through phase separation
Source: PubMed Central journal article supplement (PMC8253816; doi:10.1038/s41467-021-24373-5), 2021-07-02
Supplement: 41467_2021_24373_MOESM4_ESM.pdf [file 41467_2021_24373_MOESM4_ESM.pdf]

### **Description of Additional Supplementary Files**

File Name: Supplementary Data 1

Description: qPCR Primers used in this study.

File Name: Supplementary Data 2

Description: shRNA used in this study.

File Name: Supplementary Data 3

Description: CRISPR/Cas9 screen data processed by MAGeCK algorithm.

File Name: Supplementary Data 4

Description: IP-MS data analyzed using MaxQuant version 1.6.0.1 search against Mouse Fasta database, with label free quantification and match between runs functions enabled.
